# Correction: Structural modeling and role of HAX-1 as a positive allosteric modulator of human serine protease HtrA2

Lalith K. Chaganti, Shubhankar Dutta, Raja Reddy Kuppili, Mriganka Mandal and  Kakoli Bose

*Biochem J* (2019) 476 (20): 2965–2980. <https://doi.org/10.1042/BCJ20190569>

The authors would like to acknowledge an additional source of funding for their article, which was omitted from the original article: Advanced Centre for Treatment, Research and Education in Cancer (ACTREC) [Grant Number: IEC project no. 192]

Correction published:  
31 January 2020
